# Supplementary material for: Self-healing liquid Ga-based anodes with regulated wetting and working temperatures for advanced Mg ion batteries
Source: Royal Society of Chemistry journal article supplement (doi:10.1039/d1ta04677b), 2021-01-01
Supplement: d1ta04677b1.pdf [file d1ta04677b1.pdf]

**Electronic Supplementary Information:**

**Self-healing liquid Ga-based anodes with regulated wetting and  
working temperatures for advanced Mg ion batteries**

Meijia Song, Jiazheng Niu, Wenrun Cui, Qingguo Bai, Zhonghua Zhang\*

Key Laboratory for Liquid-Solid Structural Evolution and Processing of Materials  
(Ministry of Education), School of Materials Science and Engineering, Shandong  
University, Jingshi Road 17923, Jinan 250061, P.R. China

\*Corresponding author. Email: [zh\\_zhang@sdu.edu.cn](mailto:zh_zhang@sdu.edu.cn).

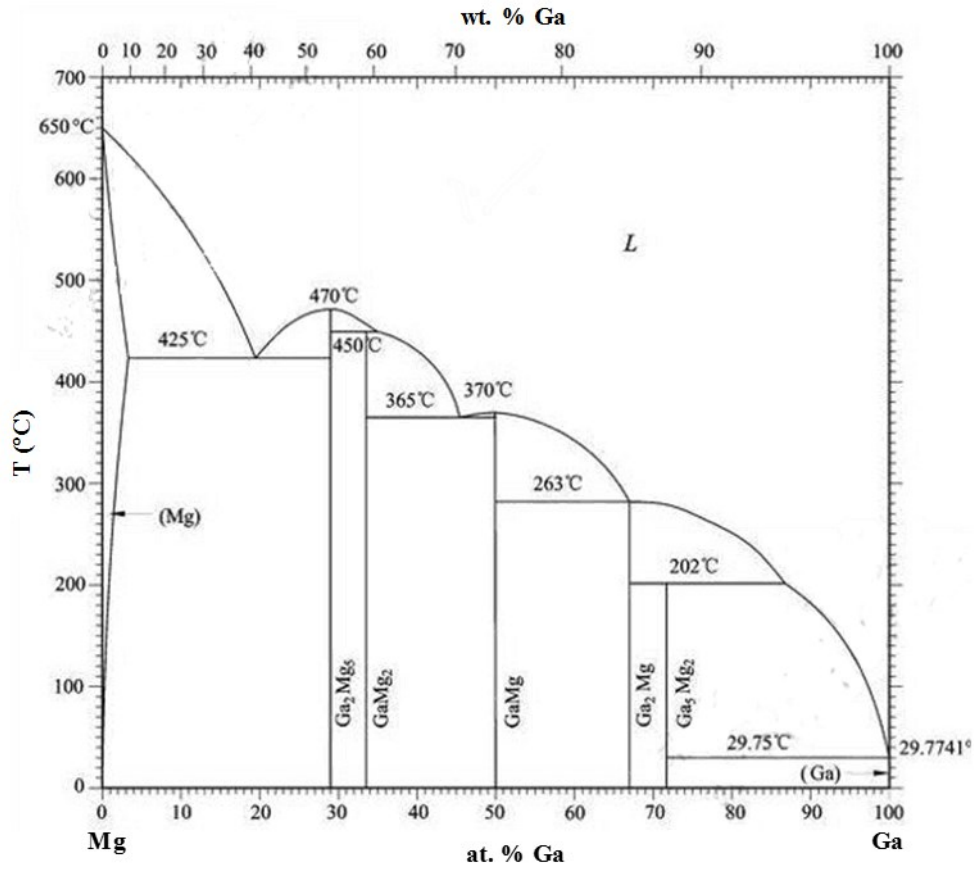

Figure S1 Binary alloy phase diagram of Mg-Ga system.<sup>1</sup>

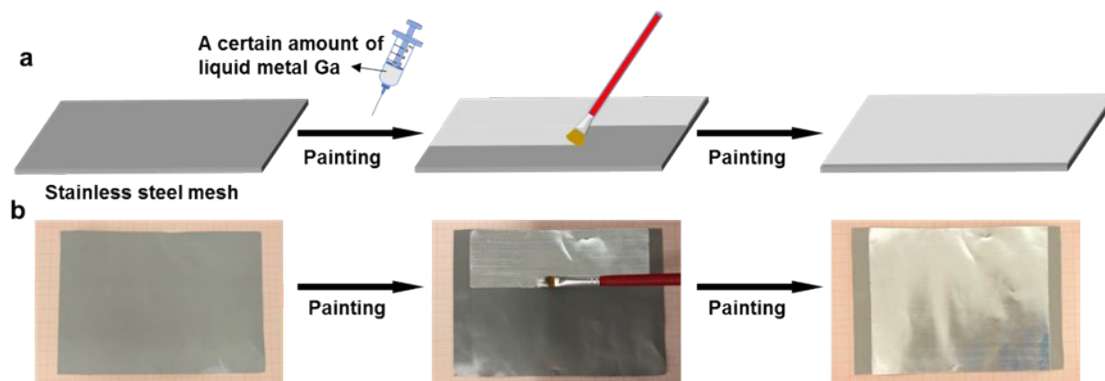

**Figure S2** (a) Schematic illustration and (b) the corresponding photographs of the preparation process of liquid Ga electrodes.

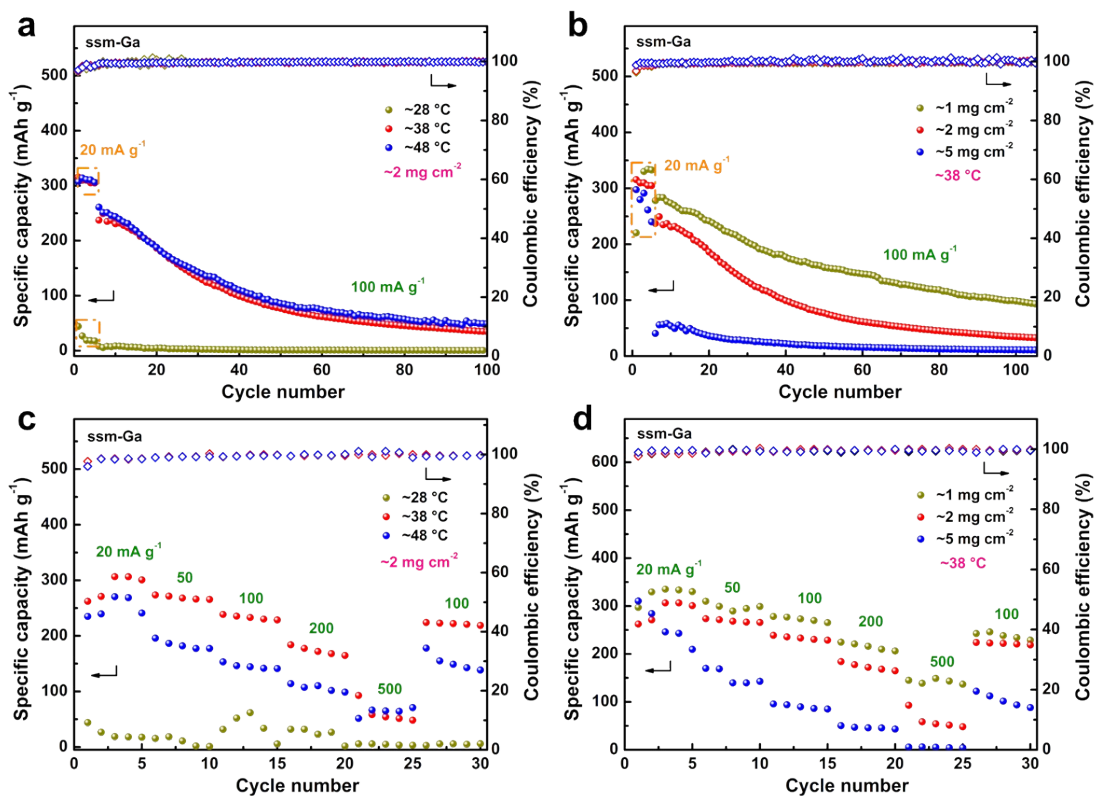

**Figure S3** (a, b) Cyclic stability and (c, d) rate performance of the liquid ssm-Ga electrodes at various temperatures and mass loadings. Five cycles were performed at a current density of 20 mA g<sup>-1</sup> prior to the cyclic stability tests.

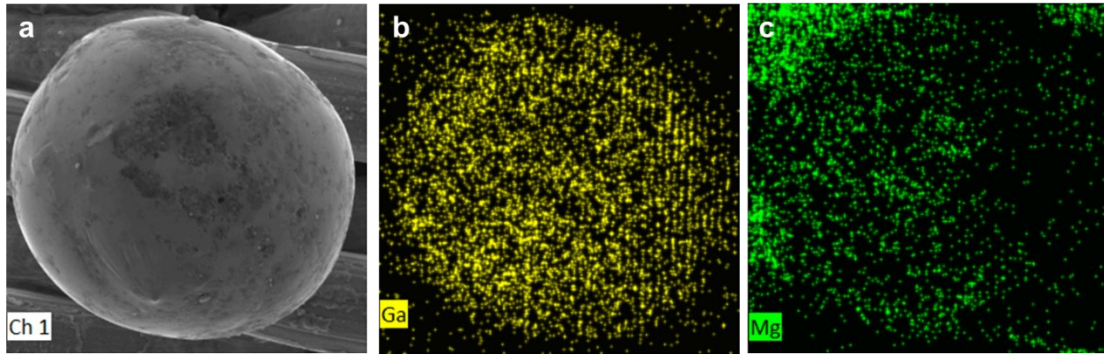

**Figure S4** (a) The SEM image of the liquid Ga electrode after the 1<sup>st</sup> charge. (b,c) The elemental distributions of Ga and Mg corresponding to (a).

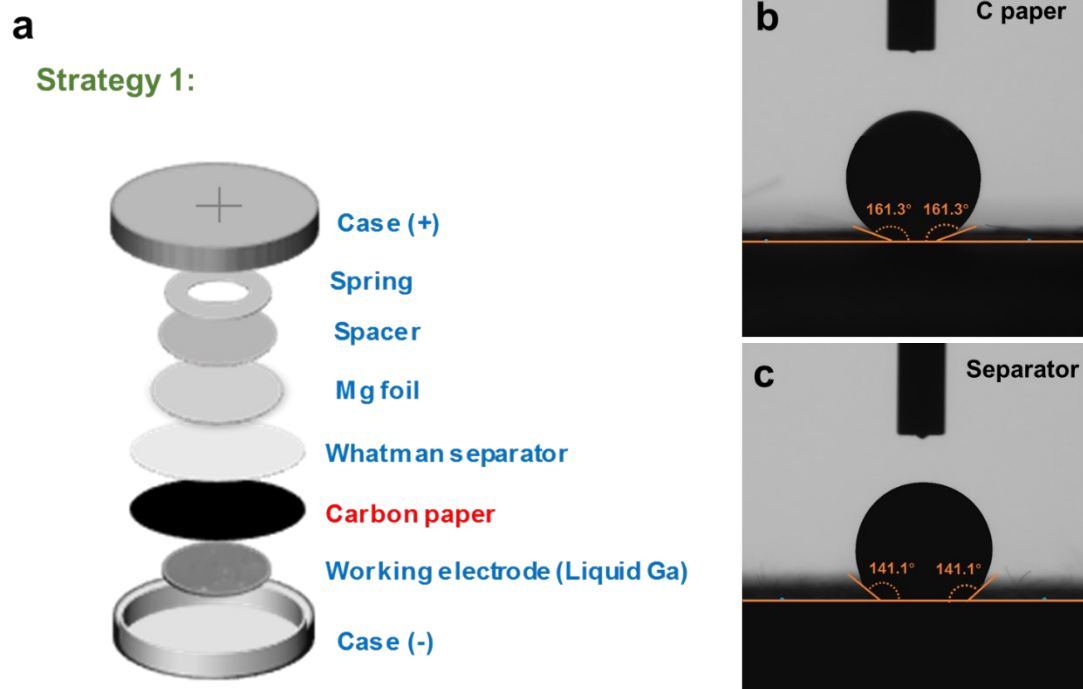

**Figure S5** (a) Schematic illustration of coin cell configuration with adding a piece of carbon paper. Contact angles of liquid Ga droplet on (b) C paper and (c) separator.

## Strategy 2:

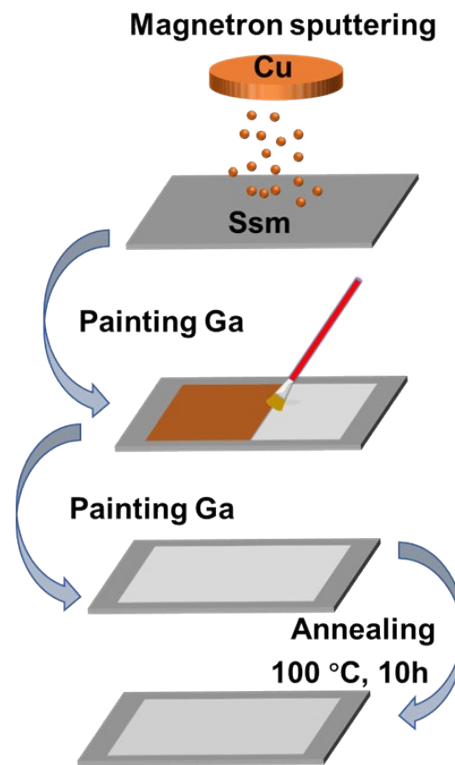

**Figure S6** Schematic illustration of the preparation process of the ssm-CuGa<sub>2</sub>-Ga electrode.

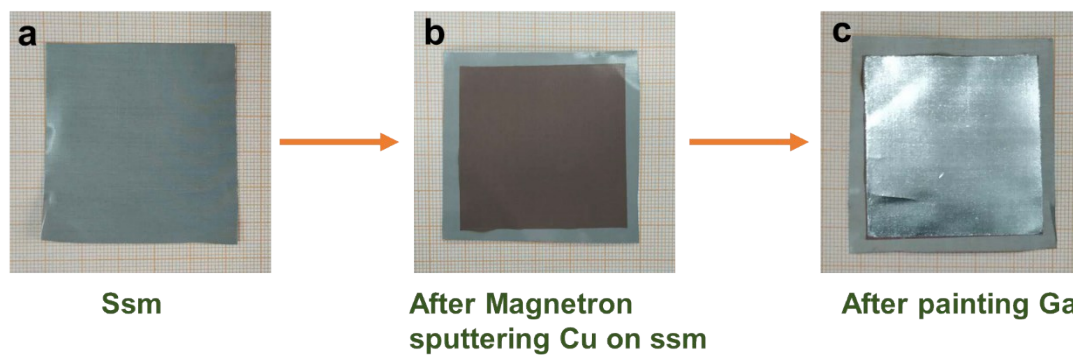

**Figure S7** The photographs of the ssm-CuGa<sub>2</sub>-Ga electrode during the preparation process.



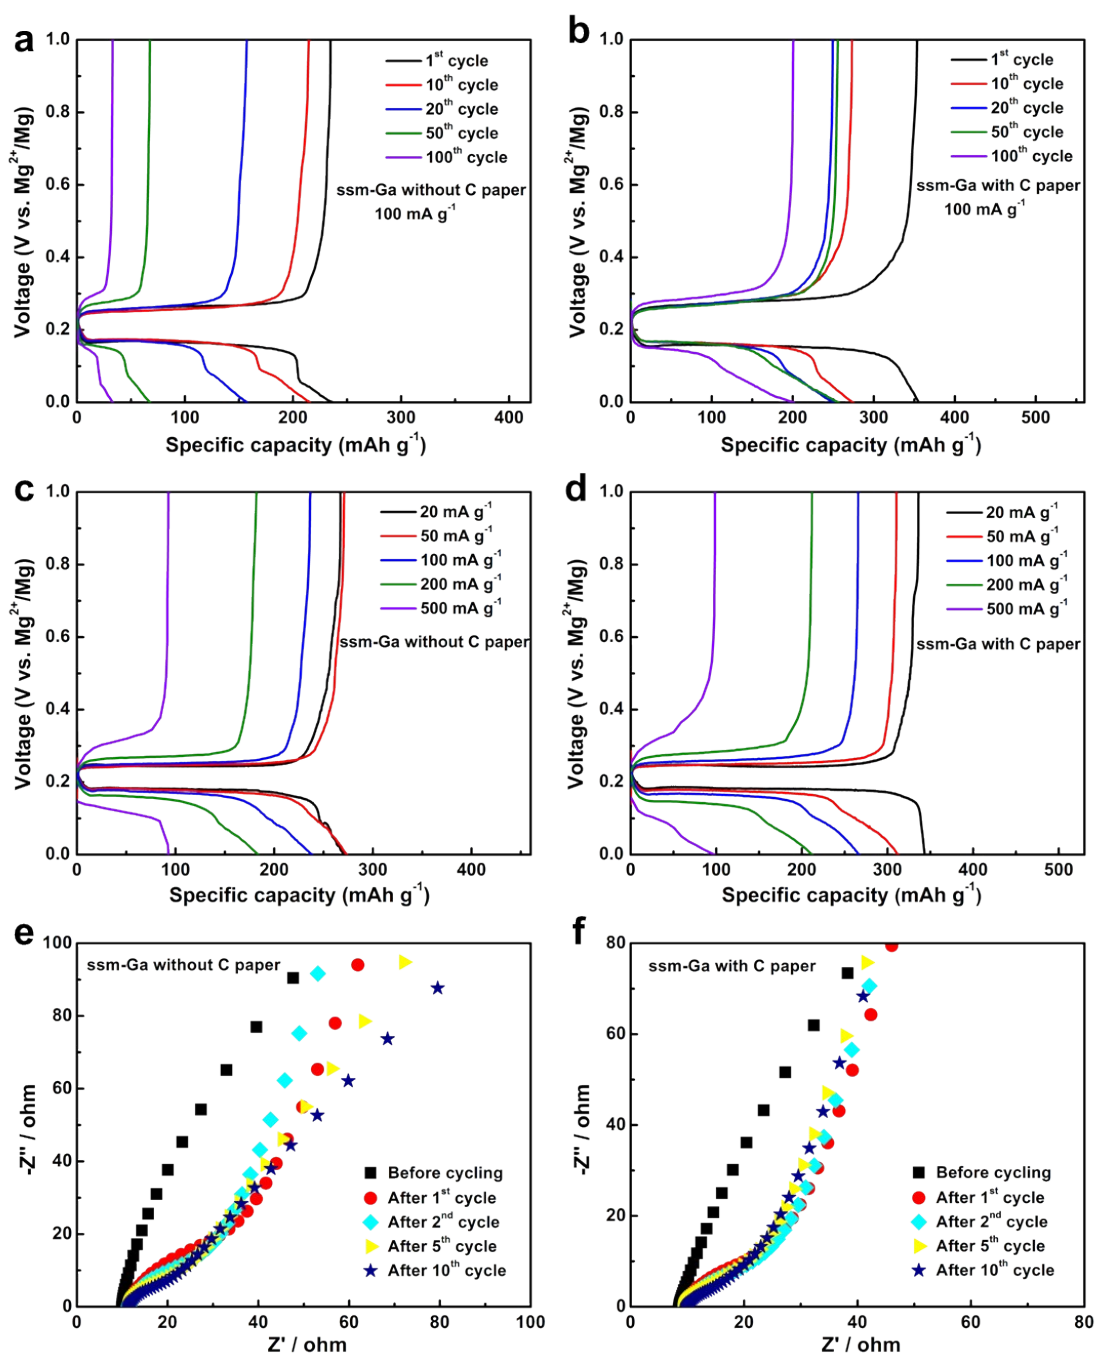

**Figure S8** The discharge/charge curves of (a) the ssm-Ga electrode without C paper and (b) the ssm-Ga electrode with C paper in different cycles at 100 mA g<sup>-1</sup>. The discharge/charge curves of (c) the ssm-Ga electrode without C paper and (d) the ssm-Ga electrode with C paper at various current densities. The Nyquist plots of (e) the ssm-Ga electrode without C paper and (f) the ssm-Ga electrode with C paper at OCV and the charged states.

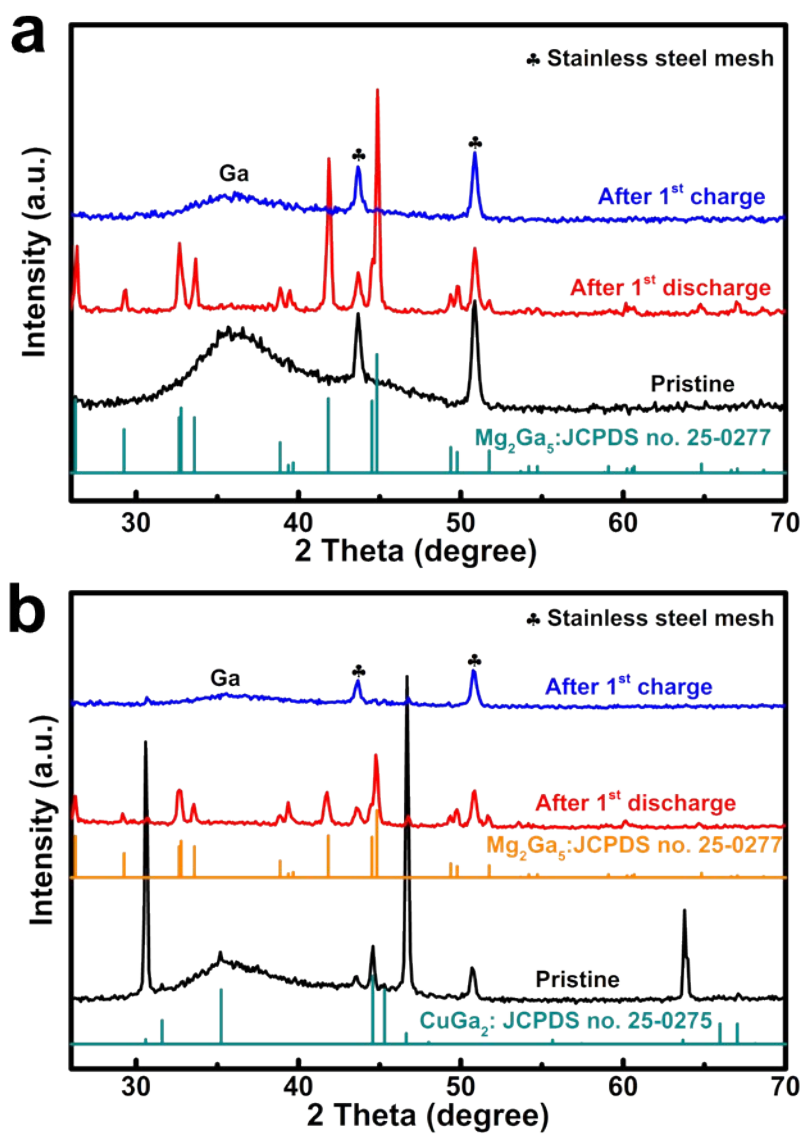

**Figure S9** The ex-situ XRD patterns of (a) the ssm-Ga electrode with C paper and (b) ssm-CuGa<sub>2</sub>-Ga electrode during the first cycle.

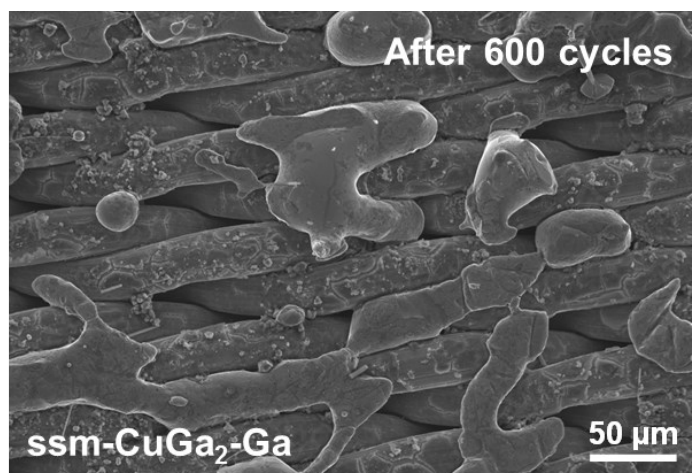

**Figure S10** SEM image of the ssm-CuGa<sub>2</sub>-Ga electrode after 600 cycles at the high current density of 500 mA g<sup>-1</sup>.

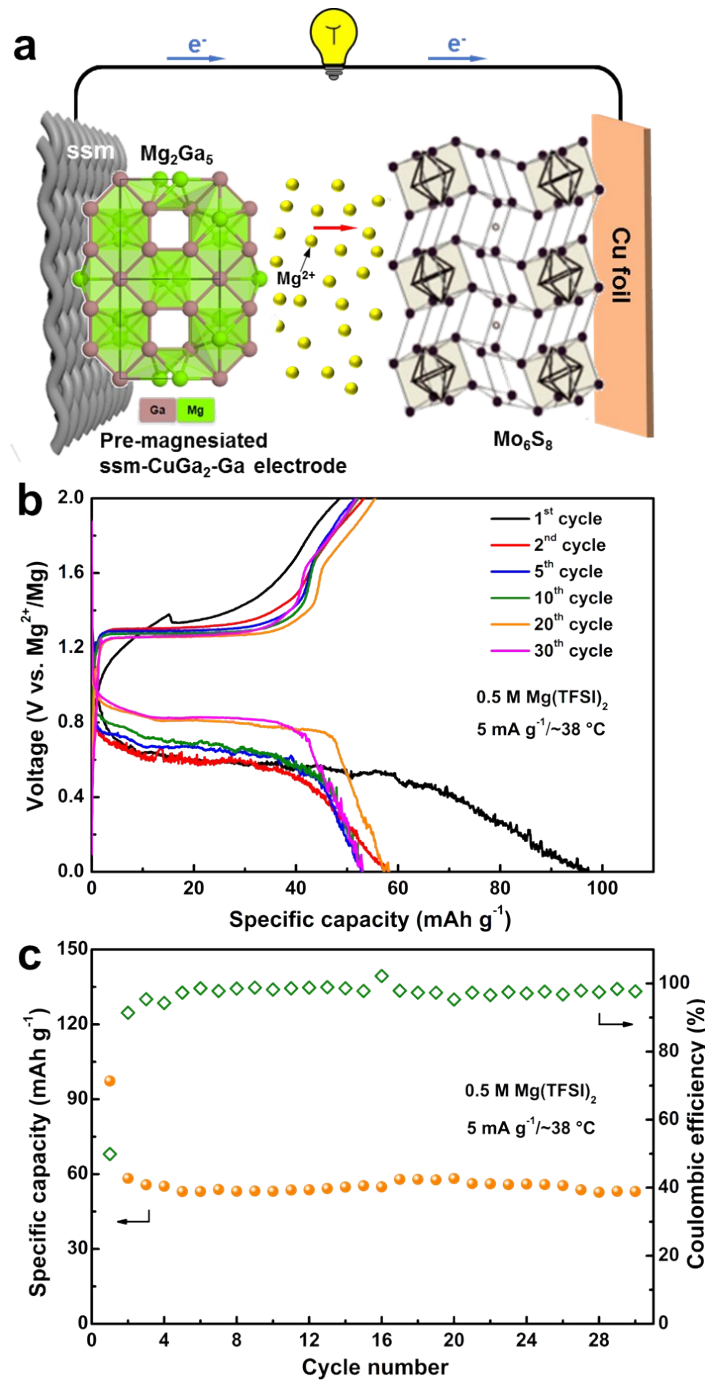

**Figure S11** Electrochemical performance of full cells consisting of the pre-magnesiated ssm-CuGa<sub>2</sub>-Ga anode and the Mo<sub>6</sub>S<sub>8</sub> cathode in the 0.5 M Mg(TFSI)<sub>2</sub> electrolyte at ~ 38 °C. (a) Schematic illustration of the full cell. (b) Discharge/charge curves and (c) cyclic stability during the first thirty cycles of this full cell.

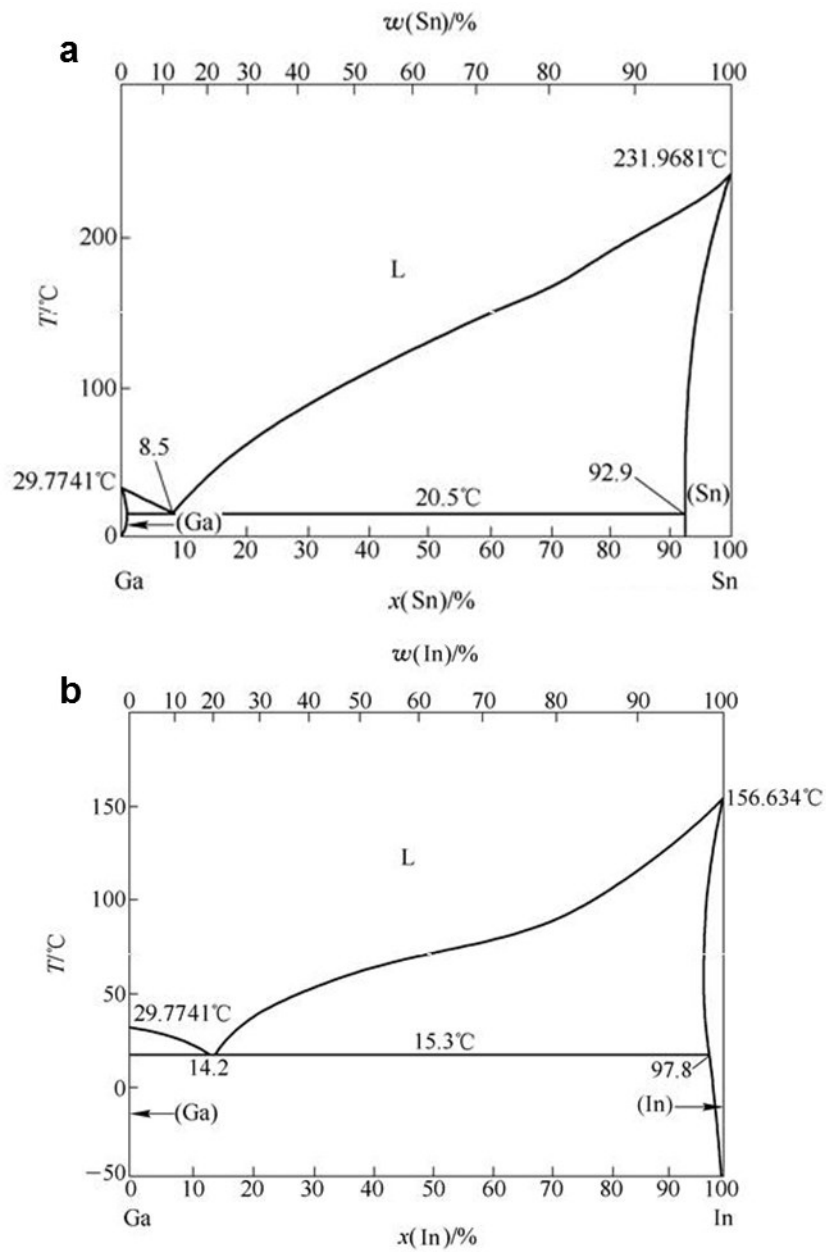

**Figure S12** Binary alloy phase diagrams of (a) Ga-Sn<sup>2</sup> and (b) Ga-In<sup>3</sup>.

## References

- 1 A. A. Nayeb-Hashemi and J. B. Clark, *Bull. Alloy Phase Diagr.*, 1985, **6**, 434-439.
- 2 T. J. Anderson and I. Ansara, *J. Phase Equilib.*, 1992, **13**, 181-189.
- 3 W. J. Svrbely and S. M. Selis, *J. Phys. Chem.*, 1954, **58**, 33-35.
